1 ***Potential health and cost impacts of a point-of-care test for neonatal sepsis and possible***  
2 ***serious bacterial infections in infants: a modeling analysis in two settings***

3

4 **Authors:** Joshua M Chevalier\* (a), Megan A Hansen\* (a), Kyra H Grantz (a, b), Birgitta  
5 Gleeson (b), Benjamin Blumel (b), Veronicah Chuchu (b), Shaukat Khan (b), Ntombi Sigwebela  
6 (c), Gwendoline Chimhini (d), Felicity Fitzgerald (e), Cecilia Ferreyra† (b), Brooke E Nichols†  
7 (a, b, f)

8

9 **Affiliations:**

- 10 a. Department of Global Health, Amsterdam Institute for Global Health and Development,  
11 Amsterdam UMC, University of Amsterdam, Amsterdam, Netherlands  
12 b. FIND, Geneva, Switzerland  
13 c. FIND, Cape Town, South Africa  
14 d. Department of Child Adolescent and Women’s Health, Faculty of Medicine and Health  
15 Sciences, University of Zimbabwe, Harare, Zimbabwe  
16 e. Department of Infectious Diseases, Imperial College London, London, United Kingdom  
17 f. Department of Global Health, Boston University School of Public Health, Boston, MA,  
18 USA

19

20 Correspondence: BE Nichols – [brooken@bu.edu](mailto:brooken@bu.edu)

21

22 \*Equal contribution

23 †Equal contribution

24 **Abstract:**

25

26 ***Introduction***

27 Sepsis accounts for up to 50% of neonatal deaths in resource-limited countries. Accurate and  
28 timely diagnosis could improve clinical outcomes, reduce inappropriate antibiotic use, and  
29 provide healthcare cost savings. We aimed to identify the minimum technical specifications and  
30 cost required of a point-of-care test (POCT) for neonatal sepsis to be clinically useful in hospital  
31 and community levels in low-resource settings.

32

33 ***Methods***

34 We modeled the diagnosis and treatment of two cohorts: hospitalized neonates and infants  
35 presenting to primary health care facilities with suspected sepsis. We compared health outcomes,  
36 including mortality, length of hospital stays, and acquisition of healthcare-associated infections  
37 (HAIs), under a POCT compared to empiric treatment and blood culture across varying test  
38 performance, prevalence of bacterial infection and discharge eligibility. A threshold health  
39 economic analysis was performed to determine the allowable POCT price to remain cost neutral  
40 to the healthcare system.

41

42 ***Results***

43 A POCT could lead to a net reduction in neonatal deaths at both the hospital level (up to 19% of  
44 deaths averted compared to baseline) and community level (up to 76% deaths averted) through  
45 faster initiation of appropriate therapy and reducing unnecessary hospitalizations and HAIs.  
46 Healthcare costs could be reduced substantially with implementation of a POCT (17%–43% of  
47 baseline costs saved in hospital and 48%–81% saved in primary healthcare settings across the  
48 range of analyzed scenarios), suggesting a POCT costing up to \$21 in hospitals and \$3 in  
49 community settings could be cost neutral.

50

51 ***Conclusions***

52 A POCT for neonatal sepsis, even with imperfect accuracy, could substantially improve clinical  
53 outcomes by improving time to diagnosis, while also supporting antibiotic de-escalation and  
54 stewardship and lowering healthcare costs. However, high clinical sensitivity is required to avoid  
55 causing deaths through missed diagnoses due to false negative results and delayed antibiotic  
56 initiation.

57 **Key Questions**

58

59 ***What is already known on this topic?***

60 It is known that neonatal sepsis and possible serious bacterial infections in infants are a serious  
61 cause of mortality; however, diagnosis to provide proper treatment and care remains difficult.

62

63 ***What does this study add?***

64 This study generates evidence on what the technical specifications and costs are required of a  
65 novel point-of-care test through mathematical modeling.

66

67 ***How might this study affect research, practice, or policy?***

68 These results can be used as criteria to guide the development of a novel point-of-care test for  
69 neonatal sepsis and bacterial infection in infants.

70

## 71 **Introduction**

72  
73 Sepsis is a significant cause of neonatal (0–28 days-old) mortality worldwide, accounting for  
74 7.3% of all neonatal deaths(1). Low- and middle-income countries with limited resources bear a  
75 disproportionate burden of neonatal sepsis, with infections presenting both in hospital and  
76 primary health care (PHC) settings (2).

77  
78 Diagnosing neonatal sepsis is difficult due to nonspecific symptoms (fever, vomiting, irritability,  
79 etc.) and a lack of readily available, easy-to-use diagnostic tests. Diagnostic testing is particularly  
80 challenging in resource-limited settings, as many lack laboratory infrastructure to routinely  
81 perform blood culture as a first step in the etiologic diagnosis and treatment of sepsis (3,4).  
82 Microbiology services, including culture and antibiotic susceptibility testing, are typically only  
83 available at higher-level facilities (5). Even where microbiology services are available, the  
84 challenge of sufficient blood-draw volume, long turnaround times, and poor quality pathogen  
85 identification and antibiotic susceptibility testing can limit the clinical utility of test results (6).

86  
87 Without timely and adequate diagnosis, hospitalized neonates or infants suspected of sepsis are  
88 treated empirically with broad-spectrum antibiotics, potentially leading to overuse of antibiotics  
89 and unnecessary hospitalization of those without bacterial infections. Antibiotic overuse in this  
90 age group can lead to morbidity and mortality, especially in low birthweight or preterm  
91 newborns, while also contributing to the growing concern of antimicrobial resistance (AMR)  
92 (7,8). Continued hospitalization of otherwise healthy neonates puts them at risk of healthcare-  
93 associated infections (HAIs) – a major cause of sepsis (9).

94  
95 At the community level, there are often no diagnostic tools available for infants with possible  
96 serious bacterial infections (pSBI) (10). Current standard practice for infants with critical illness  
97 or clinical severe infection classifications of pSBI at a PHC facility is to provide a single dose of  
98 antibiotics and referral to the nearest hospital with greater access to the necessary tools for care  
99 (4,11). However, if referral is not feasible due to distance, cost, and/or time required, antibiotic  
100 injections may be provided at the PHC level (12). This broad-scale treatment and referral to  
101 higher-level care, even for infants without true bacterial infections, results in unnecessary  
102 antibiotic use and hospitalization.

103  
104 New diagnostic tools to identify sepsis and pSBI in neonates and infants could greatly improve  
105 clinical management, guide referral decisions, and reduce misdiagnosis or unnecessary treatment  
106 (4,13). A diagnostic tool, whether in the form of an algorithm or a point-of-care test (POCT) for  
107 neonatal/infant sepsis must meet certain technical specifications (sensitivity, specificity) and a  
108 realistic price to be clinically useful and feasible to implement (3,4). To better understand these  
109 minimum diagnostic tool criteria and their impact on health-outcomes, we modeled the clinical  
110 cascades of neonates born in a hospital and infants presenting at PHC facilities suspected of

111 sepsis using the current standard-of-care and using a POCT with same day results, similar to a  
112 rapid diagnostic test. We then conducted a threshold health economic analysis to determine the  
113 prices at which implementation of a POCT would be cost neutral to the health system. This  
114 analysis provides important evidence to guide the development, implementation, and evaluation  
115 of novel diagnostic tools for neonatal sepsis.

116

## 117 **Methods**

118

119 To evaluate the potential impact of a true POCT for neonatal sepsis, we modeled diagnosis and  
120 clinical care of two cohorts with pSBI: 1) hospital-born neonates 0–28 days of age and 2)  
121 0–59 days of age presenting for care at the PHC level. Both models are parameterized using data  
122 from India and Uganda, where the best data are available, and lower-income multi-country  
123 implementation studies (**Table 1**). Both models were built using R version 4.3.1, and analyses  
124 were conducted using R and Microsoft Excel version 16.81. Since modeling methods were used,  
125 patients or the public were not involved in the design, conduct, reporting, or dissemination plans  
126 of our research.

127

### 128 ***Cohort 1: Hospitalized neonates***

129

130 The modeled population consisted of 1,000 hospital-born neonates suspected of sepsis due to risk  
131 factors (early gestational age, low birthweight) or clinical signs indicative of sepsis (fever,  
132 difficulty breathing, inconsistent heart rate). We varied the prevalence of true bacterial sepsis  
133 (i.e., prevalence of culture-positive sepsis). AMR infections, which accounted for 50% of all  
134 sepsis cases, were associated with a nearly doubled case fatality rate (CFR) compared to  
135 antibiotic susceptible infections. Relevant population parameters are summarized in **Table 1**.  
136 **Figure 1A** displays the testing and clinical care cascade of the modeled population.

137

138 Under the baseline standard-of-care, all neonates with suspected sepsis immediately received  
139 empiric antibiotic therapy and had a blood culture sample taken. We assumed that not all  
140 suspected cases in need of blood culture would receive it (due to resource limitations or  
141 insufficient blood-draw volume), meaning blood culture could only be completed for a portion of  
142 the cohort, with results returned after 48 hours. Under the POCT intervention, all neonates with  
143 suspected sepsis were tested using the POCT, and only those with a positive result immediately  
144 initiated antibiotics.

145

146 We considered varying proportions of neonates without true bacterial sepsis eligible for  
147 discharge after clinical evaluation and a negative result (blood culture or POCT) to represent  
148 well presenting neonates. Discharge eligibility ranged (23%, 35%, 58%) based on the number of  
149 neonates discharged within two, three, or five days from a neonatal intensive care unit (NICU)  
150 (14). We assumed neonates with a false negative result remained hospitalized based on their

151 clinical presentation and received additional diagnostic testing. This created a delay to antibiotic  
152 therapy, resulting in two additional days spent in the hospital and a 47% increase in the CFR  
153 (15,16). Neonates without a true bacterial infection who received antibiotic therapy from empiric  
154 treatment or false positive results and remained hospitalized were at risk of antibiotic-related  
155 morbidities and HAIs. Neonates with a true bacterial infection (true positive) had an average  
156 hospital stay of 16 days, while neonates without infection (false positive) had an average stay of  
157 seven days (14). Neonates who contracted an HAI spent an additional 11 days in the hospital, for  
158 a total stay of 18 days (17).

159

### 160 *Cohort 2: Infants in primary health care facilities*

161

162 At the community level, a modeled population of 5,000 infants (0–59 days of age) presented to  
163 PHC facilities with pSBI (**Table 1**). Infants presenting with illness were either referred to a  
164 higher-level care facility or received treatment on-site. The three categories of pSBI used by the  
165 World Health Organization (WHO) were included in the model (from greatest to least severity):  
166 critical illness, clinical severe infection (characterized by presence of at least one sign of severe  
167 infection), and fast breathing, defined as a respiratory rate >60 breaths/minute; modeled infants  
168 were defined using these categories (11,18). Each category of pSBI had an assumed underlying  
169 probability of true bacterial infection, which was varied in this analysis. Bacterial prevalence was  
170 parameterized as lower in fast breathing infants and higher in critically ill infants, compared to  
171 infants with clinical severe infection, reflecting how pSBI severity is correlated with true  
172 bacterial infection (19).

173

174 Under the standard-of-care, per WHO guidelines, fast breathing infants 7–59 days of age were  
175 treated on-site with oral amoxicillin, while infants with a clinical severe infection and critical  
176 illness were referred to inpatient care with a pre-referral dose of antibiotics (10) (**Figure 1B**).  
177 When referral was not feasible for infants with a clinical severe infection or critical illness, we  
178 assumed they were treated on-site for up to seven days with WHO-recommended antibiotic  
179 regimens. The probability of accepting referral to hospitalization (17%–90%) was varied to  
180 reflect differently resourced contexts (11). CFRs for each category of pSBI were derived from  
181 the literature (**Table 1**).

182

183 Using the POCT, all infants presenting with critical illness received a referral and a single dose  
184 of antibiotics regardless of their POCT result, while all fast-breathing infants were treated on-site  
185 without referral based on their POCT result. Infants presenting with a clinical severe infection  
186 were only referred for higher-level care, with one dose of antibiotics, if their POCT result was  
187 positive; otherwise, those with a negative POCT were monitored on-site. False positive infants  
188 with clinical severe infection received referral and treatment, while false negatives had an  
189 assumed four-hour delay to antibiotic initiation, leading to an increased CFR (13,17).

190

191 Upon referral acceptance, infants entered the hospital model (**Figure 1A**) without additional  
192 testing with the POCT. An assumed proportion underwent standard blood culture testing, leading  
193 to discharge or continued antibiotic therapy. Hospitalized infants without a true underlying  
194 bacterial infection were at risk of HAIs, experiencing a higher CFR compared to community  
195 borne infections. These CFRs differed from those in the hospital model because different clinical  
196 populations considered in each model (**Table 1**). Discharge eligibility among community  
197 referred infants without bacterial infection was held constant at 58%.

198

### 199 *Outcomes and Sensitivity Analysis*

200

201 Modeled outcomes included the number of neonatal or infant deaths, days spent hospitalized,  
202 number of HAIs, number of accepted hospital referrals, and antibiotic-associated morbidities.  
203 Diagnostic impact was quantified as the percent reduction in deaths and hospital days, and the  
204 number of HAIs and antibiotic-associated morbidities prevented through POCT use.

205

206 Diagnostic impact was assessed across a range of POCT sensitivities (80%–100%) and  
207 specificities (70%–100%). Several sensitivity analyses were performed to understand the  
208 performance of the POCT across various settings. In addition to discharge eligibility and referral  
209 acceptance, true bacterial prevalence was varied among pSBI cases (6%, 12%, 24%) and the risk  
210 of contracting an HAI (5%–20%) during the entire length of stay in both models. In the  
211 community level analysis, the CFR of HAIs was varied (12%, 29%).

212

### 213 *Economic Analysis*

214

215 A threshold health economic analysis was performed to determine the total costs of care at  
216 baseline and with the POCT to determine at which price the POCT would be cost neutral to the  
217 healthcare system. Total costs of inpatient care in India and Uganda, representing different  
218 contexts, were gathered from the provider perspective and inflated to 2023 USD (21,22). The  
219 estimated cost of treatment and care for a single day in a tertiary hospital in India was \$118 for  
220 neonates with a true bacterial infection, and \$96 for those without (21). In Uganda, daily  
221 hospitalization costs for true bacterial infection was \$39 and \$31 for neonates without infection  
222 (23). Healthy infants did not contribute any additional costs upon discharge. The maximum  
223 allowable cost for a POCT in a hospital setting was calculated by dividing hospitalization costs  
224 saved by the new diagnostic by the total number of POCTs administered to achieve cost savings.

225

226 The maximum allowable cost of a POCT at PHCs was also determined using cost savings of  
227 community management and antibiotics. Data from the literature estimates that the cost of one  
228 course of oral amoxicillin at a PHC in India to cost \$1.29, and a single visit to a PHC facility to  
229 cost \$1.88 (21,24). From the provider perspective, an infant outpatient visit to a hospital after  
230 receiving a referral was estimated to be \$18.16 (24). Inpatient care costs at a hospital following

231 referral were the same as described above for the hospital model. Healthcare costs in Uganda  
232 were used as a sensitivity analysis to represent other resource-limited settings, to identify how  
233 the costs of healthcare in different settings may reflect the maximum allowable cost for a POCT  
234 to remain cost neutral. In Uganda, community care and referral costs were reduced by 33% (23).  
235 We also performed this economic analysis excluding infants with critical illness, as their POCT  
236 results did not change clinical practice in the model.



237 **Table 1.** Model parameters for hospital and community settings. \*CFR: Case Fatality Rate

| Parameter                                                                                                                 | Value (%)        |
|---------------------------------------------------------------------------------------------------------------------------|------------------|
| <b>Hospital Model</b>                                                                                                     |                  |
| Prevalence of culture-positive sepsis among suspected cases (19,25)                                                       |                  |
| - <i>High</i>                                                                                                             | 23.6             |
| - <i>Moderate</i>                                                                                                         | 11.8             |
| - <i>Low</i>                                                                                                              | 5.9              |
| Proportion of infections which are antimicrobial resistant (6)                                                            | 49.96            |
| Proportion of suspected cases receiving blood culture (19)                                                                | 59.51            |
| Blood culture sensitivity/specificity (26)                                                                                | 66.67/100        |
| Probability of antibiotic-related morbidities among antibiotic-treated children (26)                                      | 27.71            |
| Probability of acquiring hospital-associated infection during hospitalization among children without prior infection (27) | 5, 10, 15, 20    |
| CFR*, no infection (6)                                                                                                    | 8.78             |
| CFR*, antibiotic susceptible infection (6)                                                                                | 29.00            |
| CFR*, antimicrobial resistant infection (6)                                                                               | 54.51            |
| CFR*, delayed antibiotic initiation (15)                                                                                  | 68.16            |
| CFR*, antibiotic-associated mortality (28)                                                                                | 0.88             |
| <b>Community Model</b>                                                                                                    |                  |
| Possible serious bacterial infection (11,12)                                                                              |                  |
| - <i>Proportion fast breathing (11)</i>                                                                                   | 38.72            |
| - <i>Proportion clinical severe infection (11)</i>                                                                        | 53.94            |
| - <i>Proportion critical illness (11)</i>                                                                                 | 7.34             |
| Bacterial prevalence (6,19,25)                                                                                            |                  |
| - <i>Weighted average (0.5x, 1.0x, 2.0x)</i>                                                                              | 5.2, 10.4, 20.8  |
| - <i>Fast breathing (0.5x)</i>                                                                                            | 3.0, 5.9, 11.8   |
| - <i>Clinical severe infection (1x)</i>                                                                                   | 5.9, 11.8, 23.6  |
| - <i>Critical illness (2x)</i>                                                                                            | 11.8, 23.6, 47.2 |
| CFR* (community treated—pSBI) (11)                                                                                        |                  |
| - <i>Fast breathing</i>                                                                                                   | 0.10             |
| - <i>Clinical severe infection</i>                                                                                        | 1.90             |
| - <i>Critical illness</i>                                                                                                 | 14.6             |
| CFR* (hospital-treated) (11,19,29)                                                                                        |                  |
| - <i>Non-bacterial illness</i>                                                                                            | 2.6              |
| - <i>True bacterial infection</i>                                                                                         | 11.5             |
| - <i>Healthcare-associated infection</i>                                                                                  | 12.0, 29.0       |
| Referral acceptance (11,12)                                                                                               | 17, 37, 69, 90   |

238

## 239 Results

240

### 241 *Health outcomes of hospitalized neonates following POCT implementation*

242

243 In the hospital cohort, all neonates suspected of sepsis received empiric antibiotic therapy and  
244 60% received blood culture. Blood culture results led to 5%–13% of neonates without a true  
245 infection to be discharged early, depending on underlying discharge eligibility (23%–58%). The  
246 final mortality rate among neonates who had or developed infection was 41.7%.

247

248 When HAI risk was high (20% total risk), a POCT for neonatal sepsis in hospitals led to a net  
249 reduction in neonatal deaths (0.3%–19.4% of deaths averted compared to baseline) at all test  
250 sensitivities (80%–100%) and specificities (70%–100%) under the varying modeled proportions  
251 of bacterial prevalence and discharge eligibility (**Figure 2B**). The percentage of neonatal deaths  
252 prevented increased as POCT sensitivity increased, limiting false negatives and reducing delays  
253 to antibiotic initiation for infected neonates.

254

255 The percentage of neonatal deaths prevented with a POCT was greater with lower levels of  
256 underlying bacterial prevalence (6%) and larger proportions of neonates eligible for discharge  
257 (58%). In these contexts, test specificity was particularly important to rule out infection among  
258 otherwise well-presenting neonates. Increasing test specificity led to greater percent reductions in  
259 HAIs due to earlier discharge of neonates without infection and greater reductions in antibiotic-  
260 associated morbidities due to fewer false positive results (**Figure S1–S2**). The impact of the  
261 POCT increased when HAI risk was higher (20% overall risk vs. 5%), as HAIs constituted 9%–  
262 33% of total infection related deaths when risk was low versus 28%–66% when risk was high  
263 (**Figure 2**).

264

265 Yet, in some contexts test sensitivity was the key driver of diagnostic impact. In settings with  
266 low HAI risk (5%) and discharge eligibility (23%), but high bacterial prevalence (24%), excess  
267 deaths occurred with the POCT compared to baseline (0.2%–1.6% relative increase) when  
268 sensitivity was below 85% due to increasing false negative results and subsequent delays in  
269 antibiotic therapy among infected neonates. With a test sensitivity of 85%, specificity greater  
270 than 80% was required to avoid increases in mortality across all contexts (**Figure 2A**).

271

272 Earlier discharge leading to reduced HAI opportunity, resulted in a net reduction in hospital  
273 days. The total number of hospital days was reduced by 8.2%–50.9% with POCT use (**Figure**  
274 **S3**). The percent reduction in hospital days followed similar trends to neonatal deaths, with  
275 respect to test specifications, discharge eligibility, and bacterial prevalence, but was not  
276 significantly impacted by HAI risk.

## 277 *Health outcomes of community-presenting infants following POCT implementation*

278  
279 In the modeled PHC cohort of 5,000 infants with pSBI, the proportion of infants correctly  
280 referred at baseline (i.e., infants with true bacterial infection) varied from 17% to 33% as the  
281 underlying bacterial prevalence increased (6%–24%). The proportion of correct referrals  
282 increased from 17% at baseline to 38% upon POCT implementation with the lowest modeled test  
283 specifications (80% sensitive, 70% specific) when bacterial prevalence was low and from 33% to  
284 58% when bacterial prevalence was high (**Figure S4**). The relative impact of the POCT on  
285 appropriate referrals largely relied on high test specificity which led to more correct referrals.

286  
287 At baseline, 13–50 infant deaths occurred in PHC clinics and hospitals per 1,000 pSBI episodes  
288 across all modeled scenarios (**Figure S5**). Mortality increased as underlying bacterial prevalence  
289 and referral acceptance increased. Increasing referral acceptance led to increased hospital  
290 admission of infants without bacterial infection, posing risk of HAIs. HAI deaths constituted  
291 between 0.6%–44.7% of total deaths at baseline, depending on referral acceptance, bacterial  
292 prevalence, HAI acquisition rate, and associated CFRs within the hospital setting (**Figure S6**).

293  
294 A POCT to inform hospital referrals reduced total infant deaths, relative to baseline, when test  
295 sensitivity and specificity were sufficiently high (**Figure 3**). At low levels of bacterial prevalence  
296 and high levels of referral acceptance, and when HAI risk (20%) and mortality (29%) were high,  
297 a POCT with high sensitivity and specificity could reduce infant deaths by up to 70% (**Figure**  
298 **3B**). However, when sensitivity and specificity were low, there was an increase in deaths (3.5%–  
299 48% more deaths compared to baseline) at lower levels of referral acceptance and higher levels  
300 of bacterial prevalence. This was attributed to delayed antibiotic initiation associated with a false  
301 negative POCT result causing poorer clinical outcomes. The range of scenarios in which deaths  
302 increased was greater when HAI risk and mortality were low (5% and 12% respectively) (**Figure**  
303 **3A**).

304  
305 To limit the number of deaths caused by false negative results, a high sensitivity of at least 90%  
306 could be combined with a lower specificity (70%) to reduce total infant deaths across most  
307 scenarios. However, under the worst-case scenarios, test sensitivity ( $\geq 98\%$ ) and specificity  
308 ( $\geq 95\%$ ) would need to be exceedingly high to avoid excess infant mortality.

## 309 *Sensitivity Analysis*

310  
311  
312 Univariate sensitivity analyses of parameters used in both the hospital and community models,  
313 and their relationship with the number of infant deaths averted stratified by HAI risk are shown  
314 in **Figure 4**. Sensitivity and specificity were held at 85% and 80% in the hospital model, and  
315 90% and 70% in the community model, representing the identified necessary minimum  
316 specifications to reduce mortality across most scenarios.

317  
318 At the hospital level, increasing test specificity, prompting more accurate negative diagnoses,  
319 drove the reduction in neonatal deaths by discharging earlier and reducing HAIs. HAI risk also  
320 substantially influenced the potential reductions in mortality; when HAI risk was low, there was  
321 less potential for the POCT to prevent deaths through reductions in unnecessary hospitalization.

322  
323 At the community level, the probability of referral acceptance had an outsized influence on the  
324 potential impact of a POCT, dictating the potential for accurate negative diagnoses with a POCT  
325 to avert unnecessary hospitalization. Overall bacterial prevalence also shaped the impact of the  
326 POCT, with greater potential impact when prevalence was lower (i.e., when there were more  
327 healthy infants who benefitted from accurate non-referral).

### 328 329 *Economic Analysis*

330  
331 POCT implementation among hospitalized neonates led to a reduction in hospitalization days  
332 among the cohort (**Figure S7**), generating a 17%–43% reduction in total costs of treatment and  
333 care at various levels of bacterial prevalence, proportion of neonates eligible for discharge, and  
334 test sensitivity and specificity. Greater relative costs were saved when bacterial prevalence was  
335 lower (6%) compared to when prevalence was higher (24%), indicating the benefits of the  
336 diagnostic lie largely in identifying discharge-eligible neonates without infection (**Figure S8,**  
337 **S9**). However, costs saved do not perfectly mirror trends in mortality shown in **Figure 2** since  
338 higher mortality is associated with fewer days spent in the hospital and thus lower healthcare  
339 costs.

340  
341 Cost savings were even more considerable with the implementation of a POCT at the community  
342 level, saving 48%–81% of total costs of follow-up and treatment compared to baseline by  
343 limiting inappropriate referrals and hospitalization days. Since fewer inappropriate referrals  
344 occurred at baseline when bacterial prevalence was low, there were more cost savings with  
345 POCT implementation. Across all bacterial prevalence and proportions of infants eligible for  
346 discharge, cost savings increased with better test performance (higher sensitivity and/or  
347 specificity) (**Figure S10, S11**). Excluding infants with critical illness from the threshold analysis  
348 allowed the median cost of a POCT to increase, from \$0.86–\$1 in India and \$0.28–\$0.33 in  
349 Uganda, across varied scenarios compared to allowable POCT costs including infants with  
350 critical illness (**Figure S12, S13**).

351  
352 To ensure that this test is financially feasible to implement across all settings and range of  
353 uncertainty, our analysis indicates that a globally acceptable POCT for neonatal sepsis in a  
354 hospital setting should not exceed \$21 USD. Likewise, to ensure cost neutrality in the  
355 community setting, the lowest of the costs saved per test administered (\$3) should be selected as  
356 the optimal cost of the POCT at the PHC level (**Table S1, S2**). These results are reported

357 following the Consolidated Health Economic Evaluation Reporting Standards (CHEERS) (Table  
358 S3).

359

## 360 Discussion

361

362 Implementation of a sufficiently accurate POCT for sepsis detection in neonates or infants at  
363 hospital and community level facilities can reduce overall morbidity and mortality, while  
364 remaining cost neutral when priced appropriately. Although the exact impact of a POCT heavily  
365 depends on the specific use case implementation context, our modeling found that a test with at  
366 least 85% sensitivity and 80% specificity for hospitalized neonates and 90% sensitivity and 70%  
367 specificity for community-presenting infants is likely to reduce mortality.

368

369 If test sensitivity were to be lower than these values, deaths caused by missed diagnosis of true  
370 sepsis cases and ensued delays in antibiotic initiation could lead to overall increases in mortality.  
371 However, there were instances where tests of low sensitivity and high specificity, due to large  
372 reductions in unnecessary hospitalization, antibiotic use, and HAI acquisition among uninfected  
373 patients, could lead to declines in mortality and costs despite the increased number of false  
374 negative diagnoses. While the overall benefits of a POCT may outweigh the consequences of  
375 false negatives in these scenarios, a test sensitivity well above 80% should remain the diagnostic  
376 criterion, with a sensitivity of 90% serving as an ideal standard. A POCT with a low sensitivity  
377 would have limited utility in independently ruling out sepsis among neonates and infants.

378

379 Along with sensitivity, test specificity needs to be sufficiently high to reduce unnecessary  
380 hospitalizations and HAIs. However, even a test with lower specificity will improve upon the  
381 standard of care and can be tolerated in some contexts. In the hospital setting, a specificity of  
382 80% combined with a sensitivity of 85% saw a net reduction in neonatal deaths. However, in the  
383 community setting, 70% specificity with 90% sensitivity led to reduced infant deaths in most  
384 scenarios, excluding contexts with low referral acceptance (17%) and high bacterial prevalence  
385 (24%). Under these circumstances, even 100% specificity would be insufficient unless sensitivity  
386 was 98%, principally speaking to the importance of evaluating contextual factors when  
387 implementing a POCT.

388

389 Given the complexity in diagnosing sepsis in neonates and infants, it is likely that a POCT be  
390 used as part of a diagnostic package, which may affect overall diagnostic impact and modify the  
391 requirements and trade-offs between POCT sensitivity and specificity. Although a true POCT  
392 may be difficult to develop, a near POCT may have reduced impact compared to our modeled  
393 results by creating delays to test results. The POCT could be one component of a clinical  
394 algorithm that includes signs, symptoms and risk factors, thereby reducing the required POCT  
395 performance to achieve net benefits through the diagnostic algorithm. Additionally, we did not  
396 consider the effect of positive POCT results on the timeliness to appropriate antibiotic initiation

397 and consequent potential improved health outcomes, compared to empiric therapy alone.  
398 Therefore, the POCT could have benefits not captured in this analysis.

399  
400 A key limitation of this analysis is that model parameters, assumptions, and costs were all  
401 derived from tertiary hospital and PHC studies in India and Uganda, and thus may not perfectly  
402 represent other resource-limited settings. For example, blood culture was assumed to be 100%  
403 specific in diagnosing true negatives, but culture contamination is common in these settings,  
404 thereby creating more false positive results, potentially altering health outcomes. Likewise, the  
405 possibility of false negative results due to inadequate blood volume for optimal culture  
406 performance is also a possibility that could impact our estimates. Additionally, the model  
407 contains assumptions that may differ across the diverse environments where sepsis in neonates  
408 and infants is common, including bacterial prevalence, resistance profiles, length of hospital stay,  
409 and rates of HAIs. To account for this variability, several parameters were varied to improve  
410 model sensitivity. While we expect relative differences between the POCT and baseline  
411 standard-of-care to be consistent, these results should be interpreted with discretion as these  
412 parameters continue to evolve with potential stock-outs of appropriate antibiotic treatment and  
413 exponential growth of AMR in resource-limited settings.

414  
415 Additionally, several simplifying assumptions regarding clinical management and outcomes  
416 were made, which may not capture all the challenges of clinical pathways in diagnosing sepsis.  
417 For example, infants may become lost to follow-up after PHC referral, incurring unknown health  
418 outcomes and costs. Patients were functionally dichotomized into those who were being  
419 appropriately treated with antibiotics and untreated; in reality, treatment of bacterial sepsis is  
420 complex, and there are clinical benefits to continued refinement of antibiotic regimens that could  
421 not be incorporated here. Similarly, there are other indirect and long-term benefits to  
422 implementing POCTs that are not explicitly included in this model, including reductions in the  
423 spread of AMR and preservation of first-line antibiotics in low-resource settings. Finally, we  
424 assumed the POCT performed as intended with respect to sensitivity and specificity, but ignored  
425 the possibility of invalid results, which may come with a new technology. Clarifying diagnostic  
426 algorithms based on available and developing technologies, and the clinical management that  
427 accompany them are a necessity for accurately costing these tools in the future.

428  
429 This modeling analysis serves as a tool for understanding the necessary technical specifications,  
430 which should be taken into consideration with other technical parameters (i.e., blood volume,  
431 sample preparation guidelines, and time to result) that can be used to guide the development of a  
432 POCT as an aid to diagnose sepsis in hospitalized neonates and community-presenting infants.  
433 An accurate POCT could improve time to diagnosis and generate net reductions in hospital days,  
434 HAIs, and deaths, while promoting the de-escalation of antimicrobials in resource-limited  
435 settings. Our results displayed a critical trade-off between HAI-related deaths prevented and  
436 those caused by a false-negative diagnosis, suggesting that a high sensitivity should be

437 prioritized over specificity to avoid potential delays in antibiotic initiation. Given the nature of  
438 the settings in which the POCT will be used, its cost should not exceed \$21 in a hospital setting  
439 and \$3 in a community setting.

440  
441 Future research should focus on bridging the current gaps in data availability regarding the  
442 occurrence and clinical management of sepsis in hospitals and community settings to generate  
443 more robust and context-specific estimates of the impact of a POCT, and its downstream effect  
444 on AMR. Urgent investments in diagnostics development are needed to accelerate access to  
445 diagnostic solutions for the vulnerable populations most impacted by neonatal sepsis.

446 **Author Contributions**

447 Conceptualization: BG, CF, BEN. Data curation: JMC, MAH. Methodology: JMC, MAH, KHG,  
448 SK, BEN. Formal analysis: JMC, MAH, KHG. Investigation: JMC, MAH, BG, BB VC, KHG.  
449 Supervision: BG, CF, BB, SK, BEN, KHG. Writing – original draft: JMC, MAH. Writing –  
450 review and editing: JMC, MAH, KHG, BG, BB, VC, SK, NS, GC, FF, CF, BEN.

451

452 **Acknowledgements**

453 Not applicable.

454

455 **Competing Interests**

456 FF is a trustee of Neotree, a UK registered charity that provides technology, software  
457 information, education and support to newborn healthcare workers and medical practitioners in  
458 low resource settings (charity number: 1186748). All other authors declare no conflict of interest.  
459 The funders had no role in the design of the study, the collection, analyses, or interpretation of  
460 data, the writing of the manuscript, or the decision to publish the results.

461

462 **Ethical Approval**

463 This research utilizes publicly available data from the literature; therefore, formal ethical  
464 approval was not required. However, ethical considerations were included throughout the  
465 research process as transparency was maintained in the reporting of our modeling methodology.  
466 This statement affirms our commitment to ethical conduct in research, even in the absence of  
467 formal approval.

468

469 **Data Availability Statement**

470 We acknowledge the importance of transparent and responsible data sharing to foster scientific  
471 collaboration and advance research. All data used for this study are presented in the manuscript  
472 and gathered from publicly available literature, and therefore do not necessitate any information  
473 de-identification. For additional information, interested parties can contact JMC  
474 ([j.m.chevalier@amsterdamumc.nl](mailto:j.m.chevalier@amsterdamumc.nl)) or MAH ([m.hansen@amsterdamumc.nl](mailto:m.hansen@amsterdamumc.nl)).

475

476 **Funding**

477 This work was supported via FIND by the UK Department of Health and Social Care as part of  
478 the Global AMR Innovation Fund (GAMRIF) and with support from the Ministry of Foreign  
479 Affairs of the Government of the Netherlands. GAMRIF is a One Health UK aid fund that  
480 supports research and development around the world to reduce the threat of antimicrobial  
481 resistance in humans, animals and the environment for the benefit of people in low- and middle-  
482 income countries (LMICs). The views expressed in this publication are those of the authors and  
483 not necessarily those of the UK Department of Health and Social Care. FF is supported by a  
484 Wellcome Trust Early Career Award (227076/Z/23/Z).



## 485 **References**

- 486 1. CME Info - Child Mortality Estimates [Internet]. [cited 2024 Oct 7]. Available from:  
487 <https://childmortality.org/causes-of-death/data>
- 488 2. Fleischmann C, Reichert F, Cassini A, Horner R, Harder T, Markwart R, et al. Global  
489 incidence and mortality of neonatal sepsis: A systematic review and meta-analysis. Vol. 106,  
490 Archives of Disease in Childhood. BMJ Publishing Group; 2021. p. 745–52.
- 491 3. Adataro P, Afaya A, Salia SM, Afaya RA, Konlan KD, Agyabeng-Fandoh E, et al. Risk  
492 Factors Associated with Neonatal Sepsis: A Case Study at a Specialist Hospital in Ghana. Sci  
493 World J. 2019;2019.
- 494 4. Kirby R, Palamountain K, Spotswood N, Goldfarb D. Use Cases Sepsis Diagnostic - Infection  
495 Prevention and Control [Internet]. Available from:  
496 <https://www.unicef.org/supply/media/2946/file/sepsis-diagnostic-use-cases.pdf>
- 497 5. Ombelet S, Barbé B, Affolabi D, Ronat JB, Lompo P, Lunguya O, et al. Best Practices of  
498 Blood Cultures in Low- and Middle-Income Countries. Vol. 6, Frontiers in Medicine.  
499 Frontiers Media S.A.; 2019.
- 500 6. Agarwal R, Chaurasia S, Sankar MJ, Yadav CP, Arya S, Kapil A, et al. Characterisation and  
501 antimicrobial resistance of sepsis pathogens in neonates born in tertiary care centres in Delhi,  
502 India: a cohort study. Lancet Glob Health. 2016 Oct;4(10):e752–60.
- 503 7. Celik IH, Hanna M, Canpolat FE, Pammi M. Diagnosis of neonatal sepsis: the past, present  
504 and future. Vol. 91, Pediatric Research. Springer Nature; 2022. p. 337–50.
- 505 8. Gude SS, Peddi NC, Vuppalapati S, Gopal SV, Ramesh HM, Gude SS. Biomarkers of  
506 Neonatal Sepsis: From Being Mere Numbers to Becoming Guiding Diagnostics. Cureus. 2022  
507 Mar;
- 508 9. Rani U, Lewis LE, Chawla K, Naha A. Preventable contributors to the neonatal healthcare-  
509 associated infections: a uni-center analytical study from South India. F1000Research. 2022  
510 Apr 25;11:454.
- 511 10. Organization WH. Operationalizing management of sick young infants with possible  
512 serious bacterial infection (PSBI) when referral is not feasible in the context of existing  
513 maternal, newborn, and child health programmes [Internet]. 2015. Available from:  
514 <https://apps.who.int/iris/bitstream/handle/10665/259592/9789241512930-eng.pdf?sequence=1>
- 515 11. Nisar YB, Aboubaker S, Arifeen SE, Ariff S, Arora N, Awasthi S, et al. A multi-country  
516 implementation research initiative to jump-start scale-up of outpatient management of  
517 possible serious bacterial infections (PSBI) when a referral is not feasible: Summary findings  
518 and implications for programs. PLoS ONE. 2022 Jun;17(6 June).
- 519 12. Roy S, Patil R, Apte A, Thibe K, Dhongade A, Pawar B, et al. Feasibility of  
520 implementation of simplified management of young infants with possible serious bacterial

- 521 infection when referral is not feasible in tribal areas of Pune district, Maharashtra, India. PLoS  
522 ONE. 2020 Aug;15(8 August).
- 523 13. Gleeson B, Ferreyra C, Palamountain K, Jacob ST, Spotswood N, Kissoon N, et al. A call  
524 to bridge the diagnostic gap: diagnostic solutions for neonatal sepsis in low- and middle-  
525 income countries. *BMJ Glob Health*. 2024 Sep 1;9(9):e015862.
- 526 14. P K, S KK, K V. A study on the length of stay of neonates in neonatal intensive care unit  
527 in a referral hospital in India. *Int J Contemp Pediatr*. 6(2):746–9.
- 528 15. Schmatz M, Srinivasan L, Grundmeier RW, Elci OU, Weiss SL, Masino AJ, et al.  
529 Surviving Sepsis in a Referral Neonatal Intensive Care Unit: Association between Time to  
530 Antibiotic Administration and In-Hospital Outcomes. *J Pediatr*. 2020 Feb;217:59-65.e1.
- 531 16. Sisay EA, Mengistu BL, Taye WA, Fentie AM, Yabeyu AB. Length of Hospital Stay and  
532 Its Predictors Among Neonatal Sepsis Patients: A Retrospective Follow-Up Study. *Int J Gen  
533 Med*. 2022;15:8133–42.
- 534 17. Murki S, Vardhelli V, Deshabhotla S, Sharma D, Pawale D, Kulkarni D, et al. Predictors  
535 of length of hospital stay among preterm infants admitted to neonatal intensive care unit: Data  
536 from a multicentre collaborative network from India (INNC: Indian National Neonatal  
537 Collaborative). *J Paediatr Child Health*. 2020 Oct;56(10):1584–9.
- 538 18. Mukhopadhyay R, Arora NK, Sharma PK, Dalpath S, Limbu P, Kataria G, et al. Lessons  
539 from implementation research on community management of possible serious bacterial  
540 infection (pSBI) in young infants (0-59 days), when the referral is not feasible in Palwal  
541 District of Haryana, India. *PLoS ONE*. 2021 Jul;16(7 July).
- 542 19. Saha SK, Schrag SJ, Arifeen SE, Mullany LC, Islam MS, Shang N, et al. Causes and  
543 incidence of community-acquired serious infections among young children in south Asia  
544 (ANISA): an observational cohort study. *The Lancet*. 2018 Jul;392(10142):145–59.
- 545 20. Weiss SL, Fitzgerald JC, Balamuth F, Alpern ER, Lavelle J, Chilutti M, et al. Delayed  
546 Antimicrobial Therapy Increases Mortality and Organ Dysfunction Duration in Pediatric  
547 Sepsis. *Crit Care Med*. 2014;42(11):2409–17.
- 548 21. Karambelkar G, Malwade S, Karambelkar R. Cost analysis of Healthcare in a Private  
549 sector Neonatal Intensive Care Unit in India. *Indian Pediatr*. 2016 Sep 8;53(9):793–5.
- 550 22. Turner HC, Lauer JA, Tran BX, Teerawattananon Y, Jit M. Adjusting for Inflation and  
551 Currency Changes Within Health Economic Studies. *Value Health*. 2019 Sep;22(9):1026–32.
- 552 23. Nichols BE, Sigaloff KCE, Kityo C, Hamers RL, Baltussen R, Bertagnolio S, et al.  
553 Increasing the use of second-line therapy is a cost-effective approach to prevent the spread of  
554 drug-resistant HIV: A mathematical modelling study. *J Int AIDS Soc*. 2014;17(1).

- 555 24. Chauhan AS, Prinja S, Selvaraj S, Gupta A, Muraleedharan VR, Sundararaman T. Cost  
556 of delivering primary healthcare services through public sector in India. *Indian J Med Res.*  
557 2022 Sep;156(3):372–80.
- 558 25. Milton R, Gillespie D, Dyer C, Taiyari K, Carvalho MJ, Thomson K, et al. Neonatal  
559 sepsis and mortality in low-income and middle-income countries from a facility-based birth  
560 cohort: an international multisite prospective observational study. *Lancet Glob Health.* 2022  
561 May;10(5):e661–72.
- 562 26. Ahmad A, Iram S, Hussain S, Yusuf NW. Diagnosis of paediatric sepsis by automated  
563 blood culture system and conventional blood culture. *JPMA J Pak Med Assoc.* 2017  
564 Feb;67(2):192–5.
- 565 27. Mathur P, Malpiedi P, Walia K, Srikantiah P, Gupta S, Lohiya A, et al. Health-care-  
566 associated bloodstream and urinary tract infections in a network of hospitals in India: a  
567 multicentre, hospital-based, prospective surveillance study. *Lancet Glob Health.* 2022  
568 Sep;10(9):e1317–25.
- 569 28. Ting JY, Synnes A, Roberts A, Deshpandey A, Dow K, Yoon EW, et al. Association  
570 between antibiotic use and neonatal mortality and morbidities in very low-birth-weight infants  
571 without culture-proven sepsis or necrotizing enterocolitis. *JAMA Pediatr.* 2016  
572 Dec;170(12):1181–7.
- 573 29. Zaidi AK, Huskins WC, Thaver D, Bhutta ZA, Abbas Z, Goldmann DA. Hospital-  
574 acquired neonatal infections in developing countries. *The Lancet.* 2005 Mar;365(9465):1175–  
575 88.
- 576

577 **Figure 1.** Conceptual diagram for clinical cascade for a point-of-care test for neonatal sepsis at the primary health  
 578 care level and hospital. \**POCT*: point-of-care test, *PHC*: primary health care, *FB*: fast-breathing, *CSI*: clinical  
 579 severe infection, *CI*: critical illness, *HAI*: hospital-associated infection  
 580

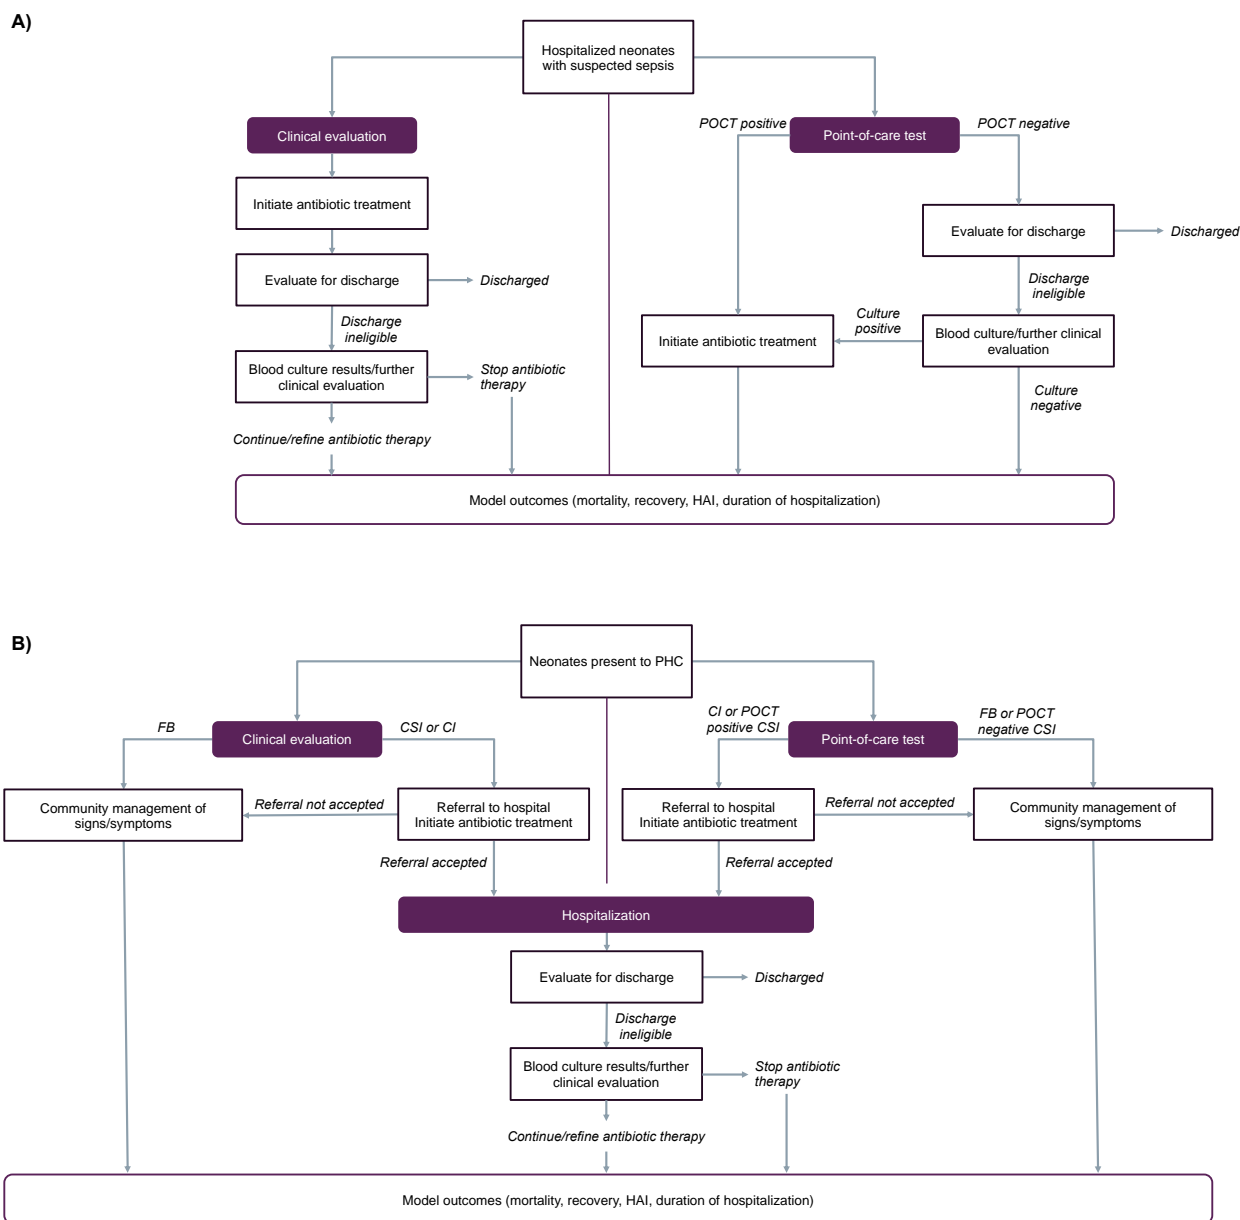

581

582 **Figure 2.** Percent reduction in neonatal deaths in a hospital setting, across modeled bacterial prevalence and  
 583 proportion of neonates eligible for discharge, by test specificity and sensitivity, when **A)** the risk of hospital-  
 584 associated infections is low (5%) or **B)** high (20%).  
 585

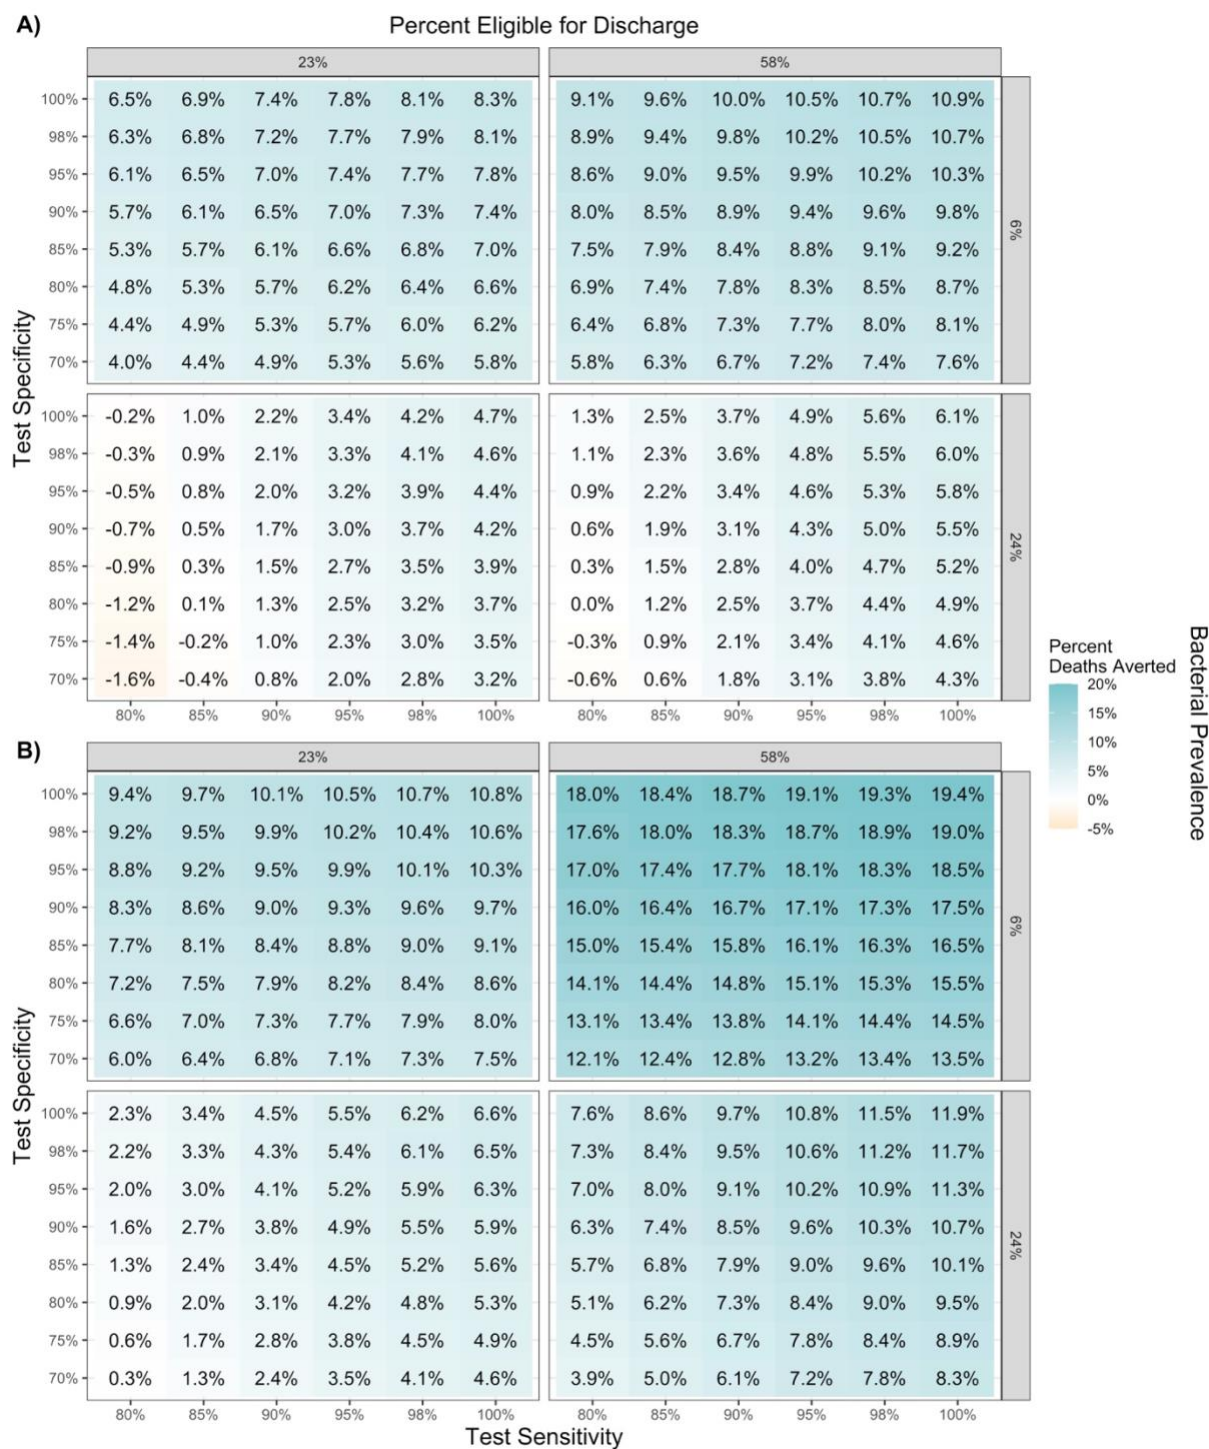

586

587 **Figure 3.** Percent of deaths averted compared to baseline when using the point-of-care test at the community level,  
 588 by test sensitivity, specificity, bacterial prevalence, and referral acceptance, when A) HAI risk and mortality are low  
 589 (5%, 12%), and B) HAI risk and mortality are high (20%, 29%)  
 590

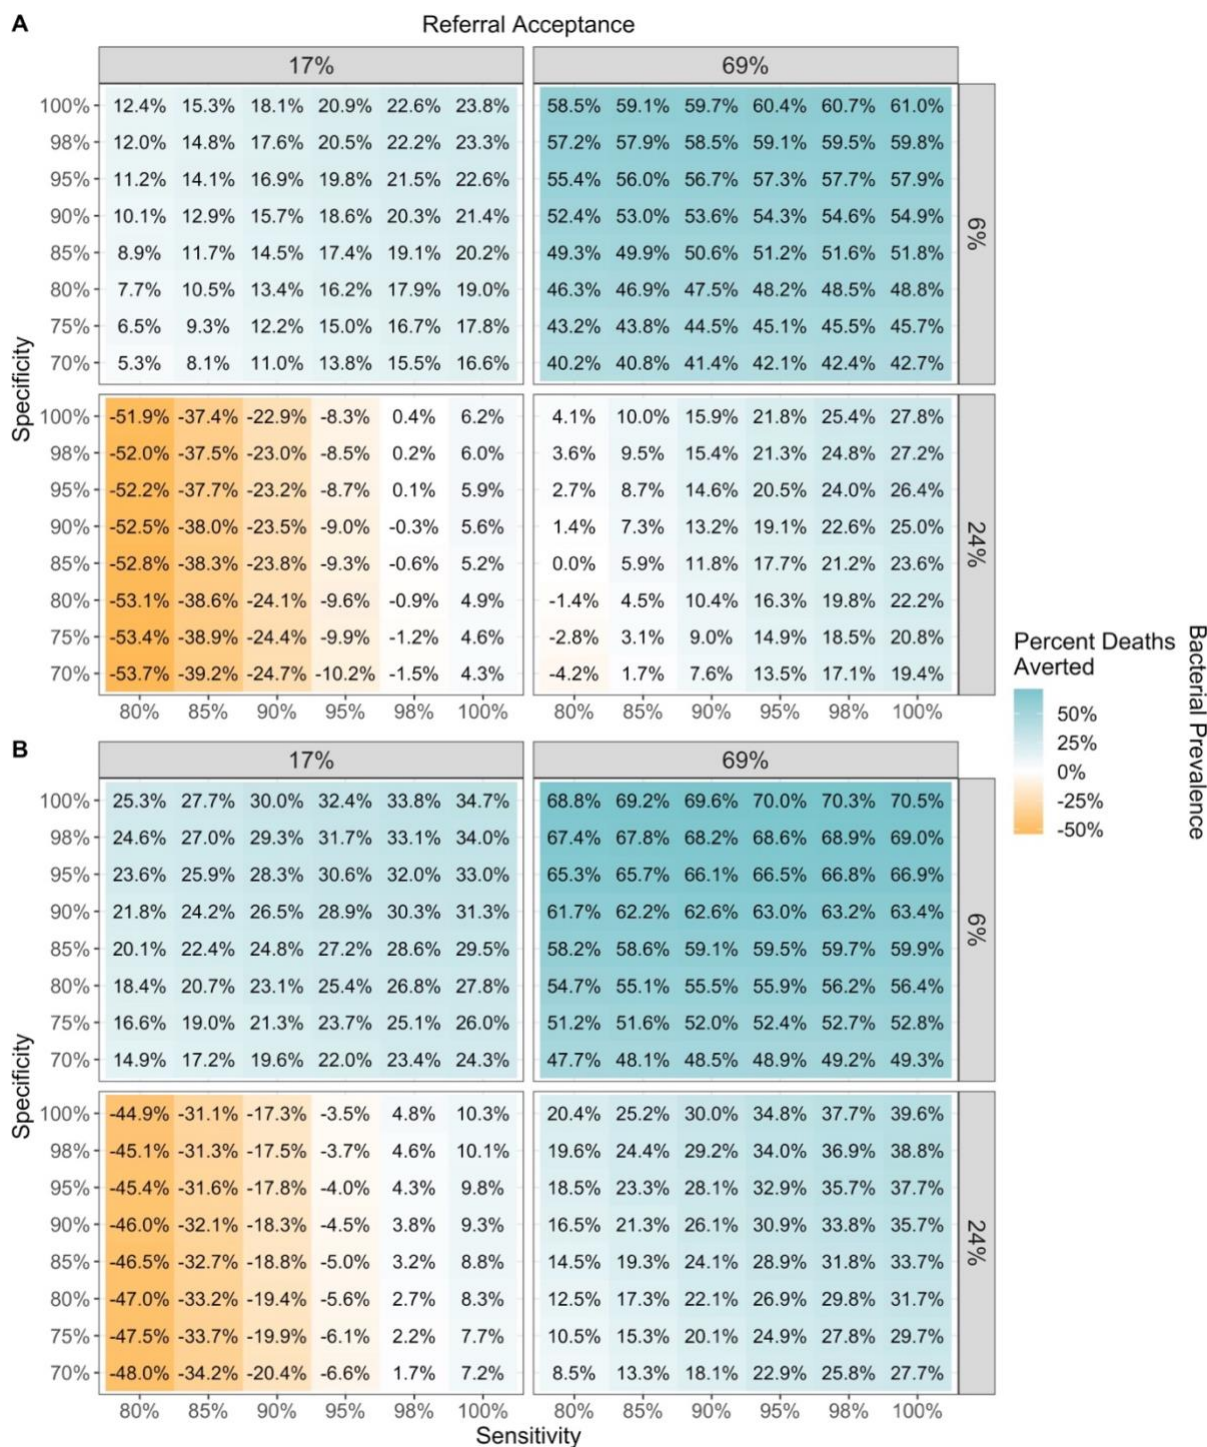

591

592 **Figure 4.** Univariate sensitivity analysis of A) hospital model parameters or B) community model parameters and  
 593 the correlated number of neonatal deaths averted, stratified by A) hospital-associated infection risk or B) hospital-  
 594 associated infection risk and case fatality rate. The absolute number of deaths averted is shown on the X-axis, while  
 595 the corresponding percentage is shown on the error bar label. The vertical red, dashed line represents the number of  
 596 deaths averted when all other variables are held at their constant A) specificity: 80%, sensitivity: 85%, discharge  
 597 eligibility: 35%, bacterial prevalence: 12% or B) specificity: 70%, sensitivity: 90%, referral acceptance: 37%,  
 598 bacterial prevalence: 12%. \*HAI: hospital-associated infection, CFR: case fatality rate  
 599

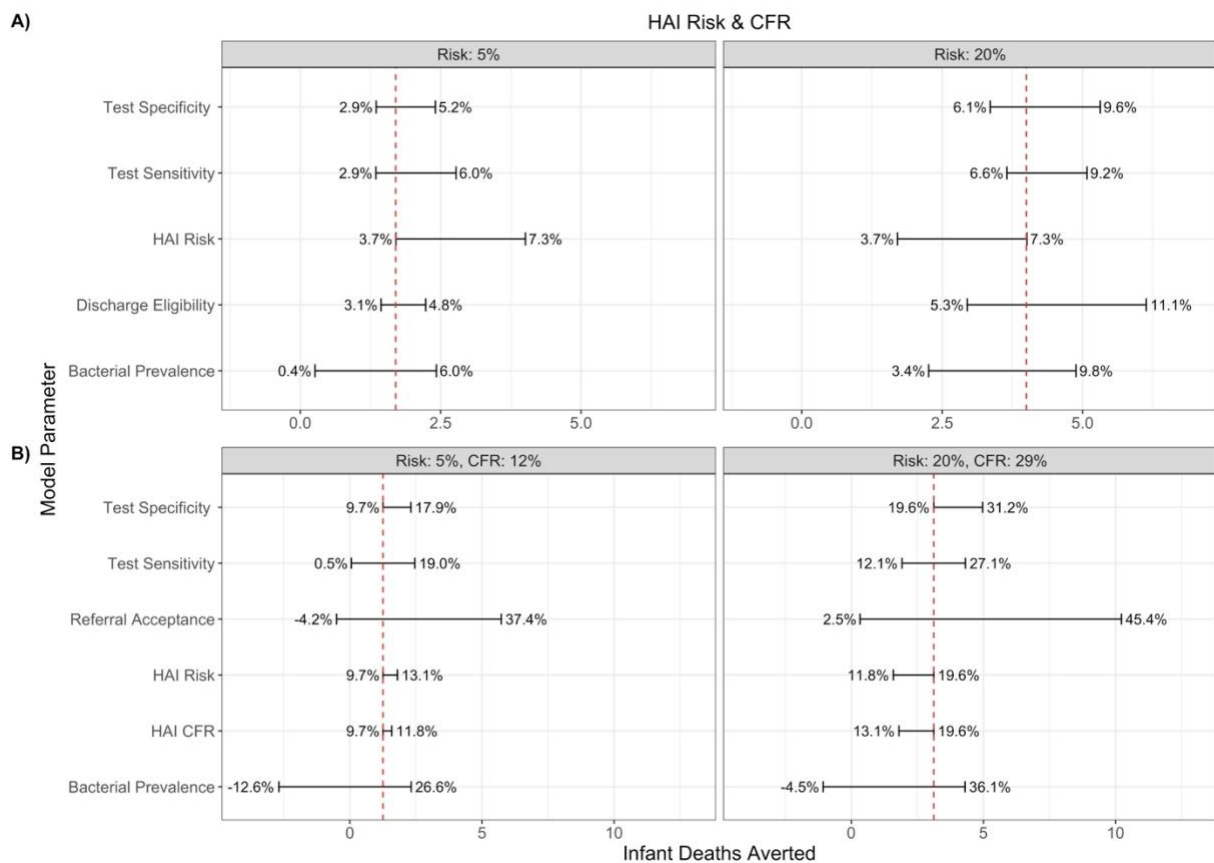

600
